# Supplementary material for: ABC Transporters and CYP3A4 Mediate Drug Interactions between Enrofloxacin and Salinomycin Leading to Increased Risk of Drug Residues and Resistance
Source: MDPI journal article supplement (doi:10.3390/antibiotics12020403), 2023-02-17
Supplement: s1 [file s1]

## Supplementary Materials

### 1. Primer information for CYP3A4, ABCB1/P-gp and ABCG2/BCRP

**Table S1.** Real-time PCR primers for Caco-2 cells.

| Gene                     | Forward primer (F)      | Reverse primer (R)       |
|--------------------------|-------------------------|--------------------------|
| P-gp<br>(NM_001348945.2) | CTAATGGCTTTCCTTCTGATGC  | TAAGCTGATAGACGTCAGACAC   |
| BCRP<br>(NM_004827.3)    | GCAGCAGGTCAGAGTGTGGTTTC | ACTGAAGCCATGACAGCCAAGATG |
| GAPDH<br>(NM_002046.7)   | CATGTTGCAACCGGGAAGGA    | CAGGAGCGCAGGGTTAGTC      |

**Table S2.** Real-time PCR primers for broiler liver and small intestine.

| Gene                       | Forward primer (F)       | Reverse primer (R)        |
|----------------------------|--------------------------|---------------------------|
| CYP3A4<br>(NM_001329508.2) | GTGGACTTCCTGCAGCTGAT     | CCTTCTCCCTGGCAGACTTG      |
| P-gp<br>(NM_204894.2)      | GCTGACTGTGTAGGGACTCA     | GGTCCAGTTGGCCTGCAAAT      |
| BCRP<br>(NM_001328490.2)   | CCGCTTGTCCACCAGTTACTTCAG | TTGCCATGTTAGTAGGTGCGATTCC |
| GAPDH<br>(NM_204305.2)     | GCAACCGTGTTGTGGACTTG     | CTCCAACAAAGGGTCCTGCT      |

### 2. Methodological results of probe drugs and its products in chicken microsome

**Table S3.** The MRM parameters of probe drugs and its metabolites.

| Compounds | Ionic mode | Parent ion (m/z) | Product ion (m/z) | De-cluster voltage (DP/V) | Collision energy (CE/V) |
|-----------|------------|------------------|-------------------|---------------------------|-------------------------|
| DM        | +          | 272.0            | 215.0             | 31                        | 39                      |
| DP        | +          | 258.1            | 199.1             | 31                        | 53                      |
| MP        | +          | 219.1            | 134.0             | 50                        | 20                      |
| 4-OH MP   | +          | 235.2            | 150.1             | 21                        | 25                      |
| DCF       | -          | 294.0            | 250.0             | -20                       | -14                     |
| 4-OH DCF  | +          | 312.1            | 230.1             | 31                        | 29                      |
| CLZ       | -          | 168.0            | 132.0             | -150                      | -22                     |
| 6-OH CLZ  | -          | 183.9            | 119.8             | -20                       | -18                     |

**Table S4.** Standard curve of probe substrates and products.

| Compounds | Linear range   | Standard curve equations | Correlation coefficient |
|-----------|----------------|--------------------------|-------------------------|
| DM        | 0.1-20 µg/L    | $y = 139158x + 306428$   | R = 0.9899              |
| DP        | 0.2-40 µg/L    | $y = 1.0426x - 29795$    | R = 0.9999              |
| MP        | 0.2-40 µg/L    | $y = 61882x + 36485$     | R = 0.9997              |
| 4-OH MP   | 0.2-40 µg/L    | $y = 1.0426x - 29795$    | R = 0.9996              |
| DCF       | 1-200 µg/L     | $y = 609.21x + 12324$    | R = 0.9963              |
| 4-OH DCF  | 0.2-40 µg/L    | $y = 54545x + 16985$     | R = 0.9999              |
| CLZ       | 1-200 µg/L     | $y = 25418x + 662591$    | R = 0.9931              |
| 4-OH CLZ  | 1-200 µg/L     | $y = 2247.9x + 46135$    | R = 0.9934              |
| HCO       | 0.005-1 µmol/L | $y = 7e^7x + 2382.4$     | R = 0.9998              |
| TS        | 0.2-50 mg/L    | $y = 18751x + 63.428$    | R = 0.9998              |

**Table S5.** Accuracy and precision of probe substrates and products in chicken liver microsomes.

| Compounds | Concentration | Intraday RSD (%) | Interday RSD (%) | Recovery (%)  |
|-----------|---------------|------------------|------------------|---------------|
| DM        | 0.2 µg/L      | 2.11             | 3.70             | 110.26 ± 6.80 |
|           | 2 µg/L        | 2.92             | 1.83             | 104.55 ± 2.68 |
|           | 20 µg/L       | 5.03             | 2.14             | 101.90 ± 1.00 |
| DP        | 0.1 µg/L      | 0.98             | 5.34             | 104.26 ± 7.26 |
|           | 1 µg/L        | 1.00             | 4.01             | 103.83 ± 1.68 |
|           | 10 µg/L       | 8.61             | 1.74             | 100.38 ± 2.27 |
| MP        | 0.2 µg/L      | 4.68             | 10.96            | 114.64 ± 6.19 |
|           | 2 µg/L        | 3.30             | 4.76             | 117.09 ± 1.25 |
|           | 20 µg/L       | 1.06             | 1.49             | 105.51 ± 1.47 |
| 4-OH MP   | 0.2 µg/L      | 1.94             | 3.80             | 106.72 ± 8.10 |
|           | 2 µg/L        | 2.98             | 0.70             | 105.11 ± 3.88 |
|           | 20 µg/L       | 2.13             | 2.64             | 99.80 ± 3.72  |
| DCF       | 1 µg/L        | 8.61             | 1.74             | 106.34 ± 9.80 |
|           | 10 µg/L       | 0.63             | 1.54             | 100.81 ± 2.01 |
|           | 100 µg/L      | 0.61             | 1.97             | 98.07 ± 1.79  |
| 4-OH DCF  | 0.2 µg/L      | 4.19             | 11.64            | 109.15 ± 8.57 |
|           | 2 µg/L        | 1.50             | 0.58             | 99.24 ± 2.58  |
|           | 20 µg/L       | 1.08             | 0.83             | 98.92 ± 1.62  |
| CLZ       | 1 µg/L        | 3.40             | 1.94             | 107.83 ± 4.56 |
|           | 10 µg/L       | 1.89             | 2.67             | 96.25 ± 2.48  |
|           | 100 µg/L      | 1.20             | 2.32             | 97.15 ± 1.86  |
| 6-OH CLZ  | 1 µg/L        | 7.83             | 5.24             | 98.61 ± 8.06  |
|           | 10 µg/L       | 2.06             | 4.49             | 97.96 ± 2.49  |
|           | 100 µg/L      | 2.20             | 1.32             | 102.34 ± 2.54 |
| HCO       | 0.01 µmol/L   | 1.34             | 1.89             | 97.0 ± 0.94   |
|           | 0.1 µmol/L    | 1.39             | 2.16             | 92.4 ± 0.14   |
|           | 1 µmol/L      | 0.36             | 1.92             | 92.3 ± 0.17   |
| TS        | 0.2 mg/L      | 2.73             | 7.42             | 99.74 ± 1.00  |
|           | 1 mg/L        | 0.95             | 4.58             | 96.93 ± 1.57  |
|           | 5 mg/L        | 0.36             | 2.31             | 100.49 ± 0.24 |

**Table S6.** LOD and LOQ of probe substrates and products.

| Compounds | LOD          | LOQ          |
|-----------|--------------|--------------|
| DM        | 0.2 µg/L     | 0.2 µg/L     |
| DP        | 0.1 µg/L     | 0.1 µg/L     |
| MP        | 0.2 µg/L     | 0.2 µg/L     |
| 4-OH MP   | 0.2 µg/L     | 0.2 µg/L     |
| DCF       | 1.0 µg/L     | 1 µg/L       |
| 4-OH DCF  | 0.2 µg/L     | 0.2 µg/L     |
| CLZ       | 1.0 µg/L     | 1 µg/L       |
| 6-OH CLZ  | 1.0 µg/L     | 1 µg/L       |
| HCO       | 0.005 µmol/L | 0.005 µmol/L |
| TS        | 0.1 mg/L     | 0.2 mg/L     |

### 3. Methodological results of ENR, CIP and SAL in plasma

**Table S7.** Standard curve of ENR, CIP and SAL.

| Compounds | Linear range | Standard curve equations | Correlation coefficient |
|-----------|--------------|--------------------------|-------------------------|
| ENR       | 20-5000 µg/L | $y = 22163x - 72772$     | $R = 0.9998$            |
| CIP       | 20-5000 µg/L | $y = 14448x - 588385$    | $R = 0.9997$            |
| SAL       | 0.2-50 µg/L  | $y = 24030x + 9118.9$    | $R = 0.9999$            |

**Table S8.** LOD and LOQ of ENR, CIP and SAL.

| Compounds | LOD      | LOQ      |
|-----------|----------|----------|
| ENR       | 10 µg/L  | 20 µg/L  |
| CIP       | 10 µg/L  | 20 µg/L  |
| SAL       | 0.2 µg/L | 0.2 µg/L |

**Table S9.** Accuracy and precision of ENR, CIP and SAL.

| Compounds | Concentration | Intraday RSD (%) | Interday RSD (%) | Recovery (%)  |
|-----------|---------------|------------------|------------------|---------------|
| ENR       | 20 µg/L       | 1.19             | 4.80             | 95.70 ± 1.40  |
|           | 100 µg/L      | 1.47             | 6.85             | 99.85 ± 2.43  |
|           | 1000 µg/L     | 2.93             | 1.02             | 107.02 ± 1.66 |
| CIP       | 20 µg/L       | 6.37             | 6.29             | 106.95 ± 3.74 |
|           | 100 µg/L      | 1.66             | 2.15             | 96.24 ± 3.20  |
|           | 1000 µg/L     | 2.94             | 1.16             | 105.90 ± 1.61 |
| SAL       | 0.2 µg/L      | 5.67             | 12.83            | 105.05 ± 5.89 |
|           | 5 µg/L        | 11.02            | 14.72            | 102.58 ± 4.54 |
|           | 50 µg/L       | 10.08            | 14.49            | 96.19 ± 5.22  |

#### 4. Pharmacokinetic parameters of ENR, CIP and SAL

**Table S10.** Main pharmacokinetic parameters of ENR in broilers after single or combined administration (n=6, Mean  $\pm$  SD).

| Parameter (Unit)              | ENR (7.5 mg/kg)  | SAL+ ENR          | SAL (5 d) + ENR   |
|-------------------------------|------------------|-------------------|-------------------|
| Ke (1/h)                      | 0.07 $\pm$ 0.01  | 0.09 $\pm$ 0.01   | 0.09 $\pm$ 0.01   |
| AUC <sub>0-36h</sub> (h*mg/L) | 12.75 $\pm$ 3.99 | 16.73 $\pm$ 1.29* | 15.32 $\pm$ 1.29* |
| AUC <sub>0-∞</sub> (h*mg/L)   | 13.50 $\pm$ 4.08 | 17.47 $\pm$ 1.45* | 16.02 $\pm$ 1.45* |
| MRT <sub>0-36h</sub> (h)      | 8.29 $\pm$ 1.03  | 9.06 $\pm$ 0.52   | 8.35 $\pm$ 0.52   |
| MRT <sub>0-∞</sub> (h)        | 10.75 $\pm$ 1.76 | 10.64 $\pm$ 0.90  | 10.05 $\pm$ 0.90  |
| C <sub>max</sub> (mg/L)       | 1.49 $\pm$ 0.54  | 1.48 $\pm$ 0.16   | 1.60 $\pm$ 0.16   |
| T <sub>max</sub> (h)          | 1.50 $\pm$ 0.55  | 2.67 $\pm$ 1.03   | 2.17 $\pm$ 1.03   |
| t <sub>1/2</sub> (h)          | 7.45 $\pm$ 1.71  | 8.65 $\pm$ 0.54   | 8.13 $\pm$ 0.86   |

**Note:** Ke, terminal elimination rate; AUC, area under the curve; C<sub>max</sub>, maximum plasma concentration; MRT, mean residence time; T<sub>1/2</sub>, elimination half-life; T<sub>max</sub>, time to reach the C<sub>max</sub>. \*statistical significance compared with ENR (7.5 mg/kg) is P < 0.05.

**Table S11.** Pharmacokinetic parameters of CIP in chickens after single or combined administration (n=6, Mean  $\pm$  SD).

| Parameter (Unit)              | ENR (7.5 mg/kg) | SAL + ENR          | SAL (5 d) + ENR     |
|-------------------------------|-----------------|--------------------|---------------------|
| Ke (1/h)                      | 0.16 $\pm$ 0.02 | 0.06 $\pm$ 0.03*** | 0.07 $\pm$ 0.02***  |
| AUC <sub>0-24h</sub> (h*mg/L) | 0.54 $\pm$ 0.18 | 1.29 $\pm$ 0.15*** | 1.22 $\pm$ 0.16***  |
| AUC <sub>0-∞</sub> (h*mg/L)   | 0.67 $\pm$ 0.21 | 1.84 $\pm$ 0.32*** | 1.57 $\pm$ 0.13***  |
| MRT <sub>0-24h</sub> (h)      | 4.90 $\pm$ 0.36 | 9.35 $\pm$ 1.06*** | 9.11 $\pm$ 0.45***  |
| MRT <sub>0-∞</sub> (h)        | 7.56 $\pm$ 1.10 | 14.11 $\pm$ 3.18** | 15.79 $\pm$ 3.83*** |
| C <sub>max</sub> (mg/L)       | 0.08 $\pm$ 0.03 | 0.10 $\pm$ 0.03    | 0.11 $\pm$ 0.02     |
| T <sub>max</sub> (h)          | 3.33 $\pm$ 1.03 | 3.20 $\pm$ 1.10    | 3.00 $\pm$ 1.10     |
| t <sub>1/2</sub> (h)          | 4.51 $\pm$ 0.60 | 11.12 $\pm$ 4.77** | 9.96 $\pm$ 2.40*    |

**Note:** Ke, terminal elimination rate; AUC, area under the curve; C<sub>max</sub>, maximum plasma concentration; MRT, mean residence time; T<sub>1/2</sub>, elimination half-life; T<sub>max</sub>, time to reach the C<sub>max</sub>. \*Statistical significance compared with ENR group (7.5 mg/kg) is P < 0.05; \*\*Statistical significance compared with ENR group (7.5 mg/kg) is P < 0.01. \*\*\*Statistical significance compared with ENR group (7.5 mg/kg) is P < 0.001.

**Table S12.** Pharmacokinetic parameters of SAL in chickens after single or combined administration (n=6, Mean  $\pm$  SD)

| Parameter (Unit)                                    | SAL (6 mg/kg)      | SAL+ ENR            | ENR (5 d) + SAL       |
|-----------------------------------------------------|--------------------|---------------------|-----------------------|
| Ke (1/h)                                            | 0.05 $\pm$ 0.01    | 0.10 $\pm$ 0.06     | 0.04 $\pm$ 0.02       |
| AUC <sub>0-48h</sub> (h* $\mu$ g/L)                 | 218.96 $\pm$ 42.32 | 148.30 $\pm$ 32.07* | 409.09 $\pm$ 39.12*** |
| AUC <sub>0-<math>\infty</math></sub> (h* $\mu$ g/L) | 264.78 $\pm$ 40.60 | 153.25 $\pm$ 31.01* | 495.16 $\pm$ 97.71*** |
| MRT <sub>0-48h</sub> (h)                            | 5.53 $\pm$ 1.16    | 6.30 $\pm$ 1.32     | 12.05 $\pm$ 1.84***   |
| MRT <sub>0-<math>\infty</math></sub> (h)            | 7.53 $\pm$ 2.39    | 8.68 $\pm$ 3.70     | 18.15 $\pm$ 5.35***   |
| C <sub>max</sub> ( $\mu$ g/L)                       | 82.02 $\pm$ 29.08  | 54.76 $\pm$ 18.55   | 134.32 $\pm$ 48.37*   |
| T <sub>max</sub> (h)                                | 0.42 $\pm$ 0.30    | 0.29 $\pm$ 0.10     | 0.29 $\pm$ 0.10       |
| t <sub>1/2</sub> (h)                                | 14.17 $\pm$ 3.10   | 14.00 $\pm$ 12.27   | 16.46 $\pm$ 6.53      |

**Note:** Ke, terminal elimination rate; AUC, area under the curve; C<sub>max</sub>, maximum plasma concentration; MRT, mean residence time; T<sub>1/2</sub>, elimination half-life; T<sub>max</sub>, time to reach the C<sub>max</sub>. \*statistical significance compared with SAL group (6.0 mg/kg) is P < 0.05; \*\*statistical significance compared with SAL group (6.0 mg/kg) is P < 0.01; \*\*\*statistical significance compared with SAL group (6.0 mg/kg) is P < 0.001.

**Table S13.** Molecule docking simulation of the compound with CYP3A4.

| Compounds | Hydrogen bonding site with CYP3A4 (PDB ID: 6MA7)    | Score |
|-----------|-----------------------------------------------------|-------|
| ENR       | A/ARG:105; <b>A/Glu: 381</b> ; A/ARG:382; A/ARG:447 | 6.92  |
| SAL       | A/Lys: 212; <b>A/Glu: 381</b>                       | 10.29 |

**Table S14.** Molecule docking simulation of the compound with P-gp.

| Compounds | Hydrogen bonding site with P-gp (PDB ID: 6C0V)                          | Score  |
|-----------|-------------------------------------------------------------------------|--------|
| ATP       | A/ASP177, <b>A/LYS181</b> , <b>A/GLU243</b> , A/ALA823, <b>A/LYS826</b> | 9.1007 |
| ENR       | <b>A/LYS181</b> , <b>A/GLU243</b> , <b>A/LYS826</b> , A/SER831          | 5.6517 |
| SAL       | <b>A/LYS181</b> , 2 A/ASN296, A/GLU353, A/SER831                        | 8.4186 |

**Table S15.** Molecule docking simulation of the compound with BCRP.

| Compounds | Hydrogen bonding site with P-gp (PDB ID: 6C0V)                                                 | Score  |
|-----------|------------------------------------------------------------------------------------------------|--------|
| ATP       | A/ARG123, <b>A/LYS124</b> , A/TRY150, A/GLN153, A/ASP154, <b>A/ASP237</b> , A/LYS490, A/CXL701 | 7.4629 |
| ENR       | A/SER114, <b>A/ ASP237</b> , A/ARG698                                                          | 5.6517 |
| SAL       | A/SER115, <b>A/LYS124</b> , A/GLU569, A/CXL701                                                 | 8.4186 |

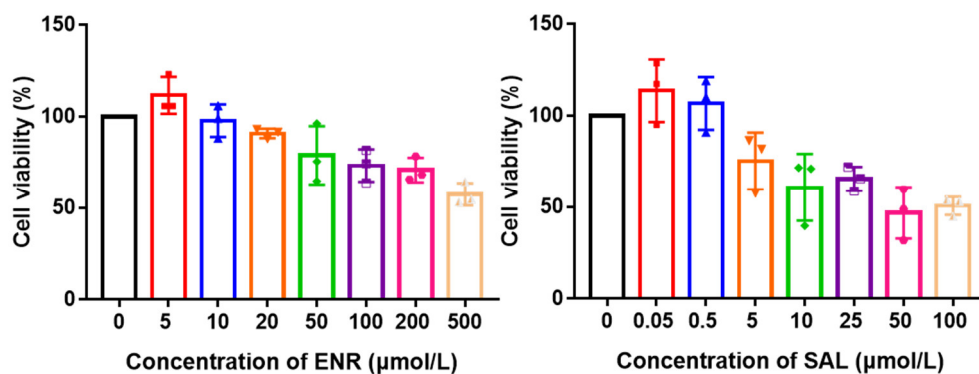

**Figure S1.** Effects of ENR and SAL exposure on the viability of Caco-2 cells.

|                                                                                                  |  |                                                                          |  |  |  |
|--------------------------------------------------------------------------------------------------|--|--------------------------------------------------------------------------|--|--|--|
| <b>VERIFY Complete</b><br>89.54% of the residues have averaged 3D-1D score >= 0.2<br><b>Pass</b> |  | <b>-----&lt;&lt;&lt; P R O C H E C K S U M M A R Y &gt;&gt;&gt;-----</b> |  |  |  |
|                                                                                                  |  | /var/www/SAVES/Jobs/1012535/saves.pdb 1.5 956 residues                   |  |  |  |
| <b>ERRAT Complete</b>                                                                            |  | Ramachandran plot: 90.5% core 8.6% allow 0.5% gener 0.5% disall          |  |  |  |
| <b>Overall Quality Factor</b>                                                                    |  | All Ramachandrans: 24 labelled residues (out of 952)                     |  |  |  |
|                                                                                                  |  | Chi1-chi2 plots: 4 labelled residues (out of 612)                        |  |  |  |
|                                                                                                  |  | Side-chain params: 5 better 0 inside 0 worse                             |  |  |  |
| <b>90.2023</b>                                                                                   |  |                                                                          |  |  |  |

**Figure S2.** The evaluation results of the CYP3A4 (PDB ID: 6MA7) model with VERIFY3D, ERRAT and PROCHECK software.

|                                                                                                  |  |                                                                          |  |  |  |
|--------------------------------------------------------------------------------------------------|--|--------------------------------------------------------------------------|--|--|--|
| <b>VERIFY Complete</b><br>94.97% of the residues have averaged 3D-1D score >= 0.2<br><b>Pass</b> |  | <b>-----&lt;&lt;&lt; P R O C H E C K S U M M A R Y &gt;&gt;&gt;-----</b> |  |  |  |
|                                                                                                  |  | /var/www/SAVES/Jobs/1012524/saves.pdb 1.5 1238 residues                  |  |  |  |
| <b>ERRAT Complete</b>                                                                            |  | Ramachandran plot: 92.0% core 7.4% allow 0.5% gener 0.1% disall          |  |  |  |
| <b>Overall Quality Factor</b>                                                                    |  | All Ramachandrans: 28 labelled residues (out of 1236)                    |  |  |  |
|                                                                                                  |  | Chi1-chi2 plots: 7 labelled residues (out of 742)                        |  |  |  |
|                                                                                                  |  | Side-chain params: 5 better 0 inside 0 worse                             |  |  |  |
| <b>93.4641</b>                                                                                   |  |                                                                          |  |  |  |

**Figure S3.** The evaluation results of the P-gp (PDB ID: 6C0V) model with VERIFY3D, ERRAT and PROCHECK software.

|                                                                                                  |  |                                                                          |  |  |  |
|--------------------------------------------------------------------------------------------------|--|--------------------------------------------------------------------------|--|--|--|
| <b>VERIFY Complete</b><br>80.43% of the residues have averaged 3D-1D score >= 0.2<br><b>Pass</b> |  | <b>-----&lt;&lt;&lt; P R O C H E C K S U M M A R Y &gt;&gt;&gt;-----</b> |  |  |  |
|                                                                                                  |  | /var/www/SAVES/Jobs/1012515/saves.pdb 1.5 639 residues                   |  |  |  |
| <b>ERRAT Complete</b>                                                                            |  | Ramachandran plot: 88.9% core 10.1% allow 0.5% gener 0.5% disall         |  |  |  |
| <b>Overall Quality Factor</b>                                                                    |  | All Ramachandrans: 24 labelled residues (out of 637)                     |  |  |  |
|                                                                                                  |  | Chi1-chi2 plots: 3 labelled residues (out of 372)                        |  |  |  |
|                                                                                                  |  | Side-chain params: 5 better 0 inside 0 worse                             |  |  |  |
| <b>86.7672</b>                                                                                   |  |                                                                          |  |  |  |

**Figure S4.** The evaluation results of the BCRP (PDB ID: 6ETI) model with VERIFY3D, ERRAT and PROCHECK software.
